# Supplementary material for: The roles of various Fe–Cu bimetallic nanoclusters in controlling the C2 selectivity for the CO reduction reaction – a DFT study
Source: Royal Society of Chemistry journal article supplement (doi:10.1039/d4cp04133j), 2025-01-01
Supplement: d4cp04133j1.pdf [file d4cp04133j1.pdf]

*Supporting Information for*

**The Roles of Various Fe-Cu Bimetallic Nanoclusters in  
Controlling the C<sub>2</sub> Selectivity for CO Reduction Reaction - A  
DFT Study**

Chen-Cheng Liao, Meng-Chi Hsieh, Yung-Yi Huang, Cheng-Yu Tu, Chun-Chih Chang\*

Department of Chemical and Materials Engineering, Chinese Culture University, No. 55,  
Hwa-Kang Road, Yang-Ming-Shan, Taipei 111, Taiwan.

\* Corresponding author E-mail: [zjz8@ulive.pccu.edu.tw](mailto:zjz8@ulive.pccu.edu.tw)

Phone: (886)-2-28610511#33133

Fax: (886)-2-28614011

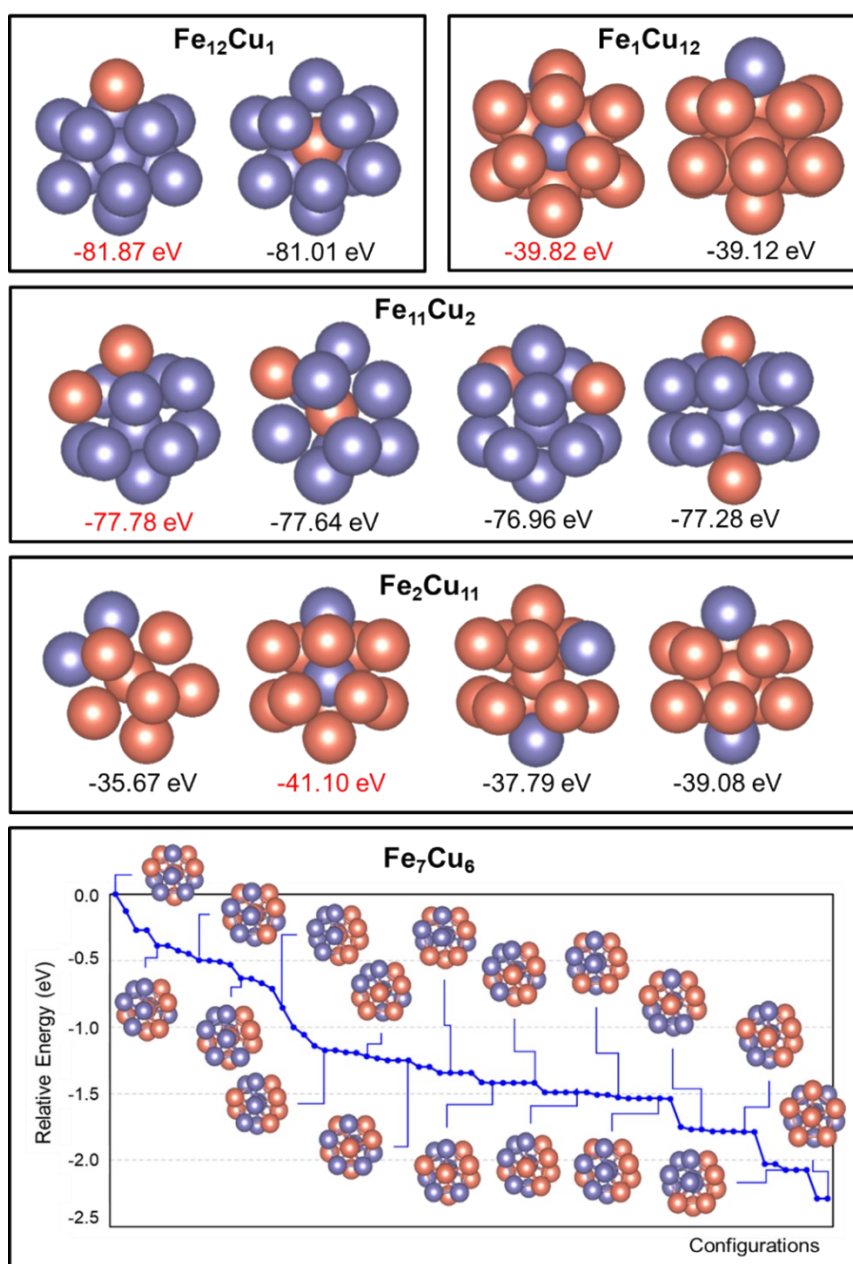

Figure S1. Relative energy (eV) of different  $\text{Fe}_n\text{Cu}_{13-n}$  ( $n = 1, 2, 7, 11, 12$ ) nanocluster configurations.

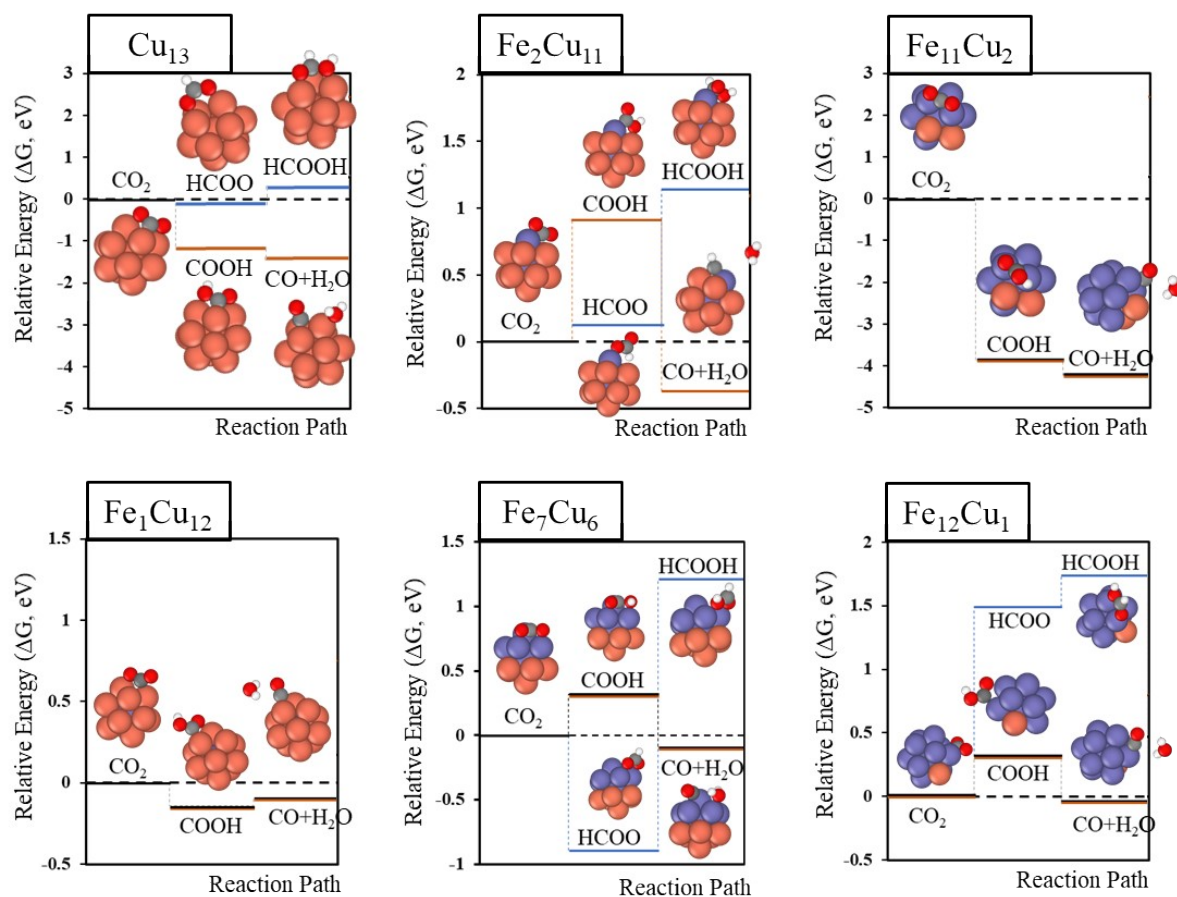

Figure S2. The profiles of the potential energy surface (  $\Delta G$ , eV ) of CO<sub>2</sub> molecules reduction on Cu<sub>13</sub> and Fe<sub>n</sub>Cu<sub>13-n</sub> (n = 1, 2, 7, 11, 12) nanoclusters, illustrating the relative energies of various intermediates and products in the reaction pathway.

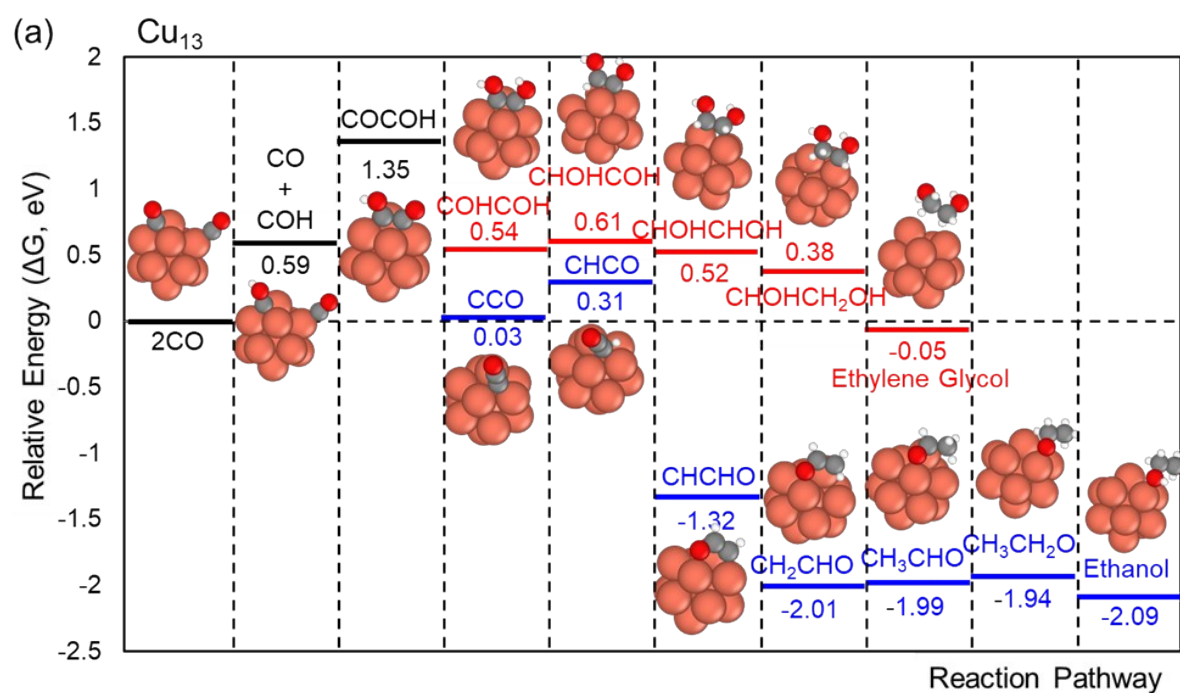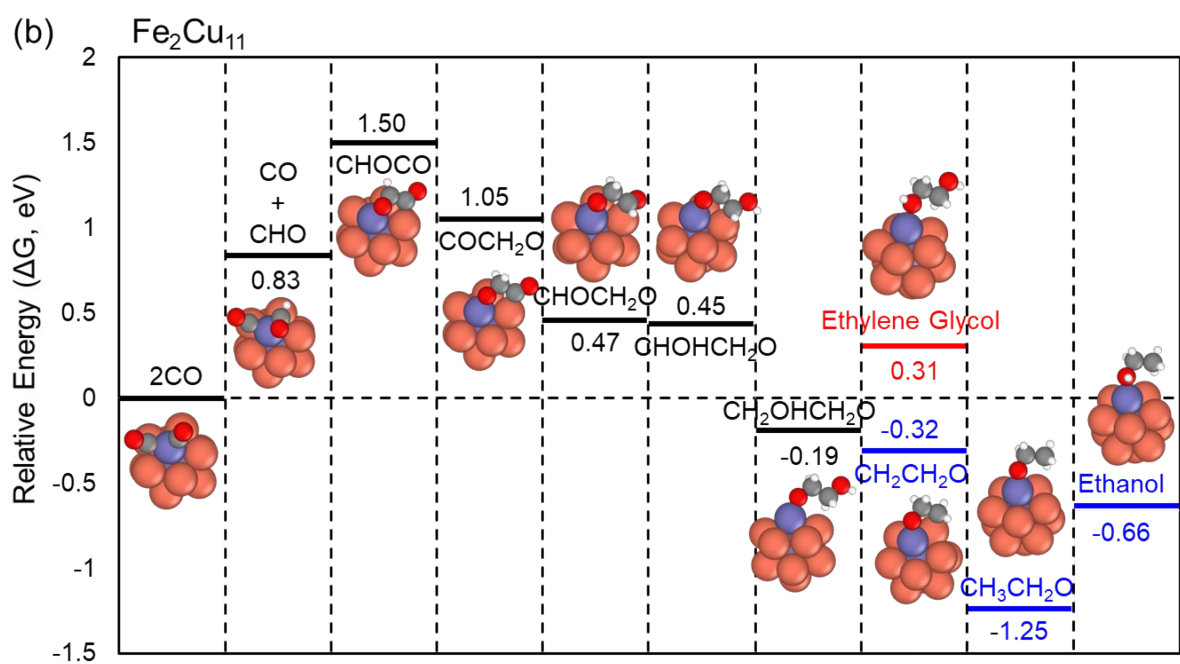

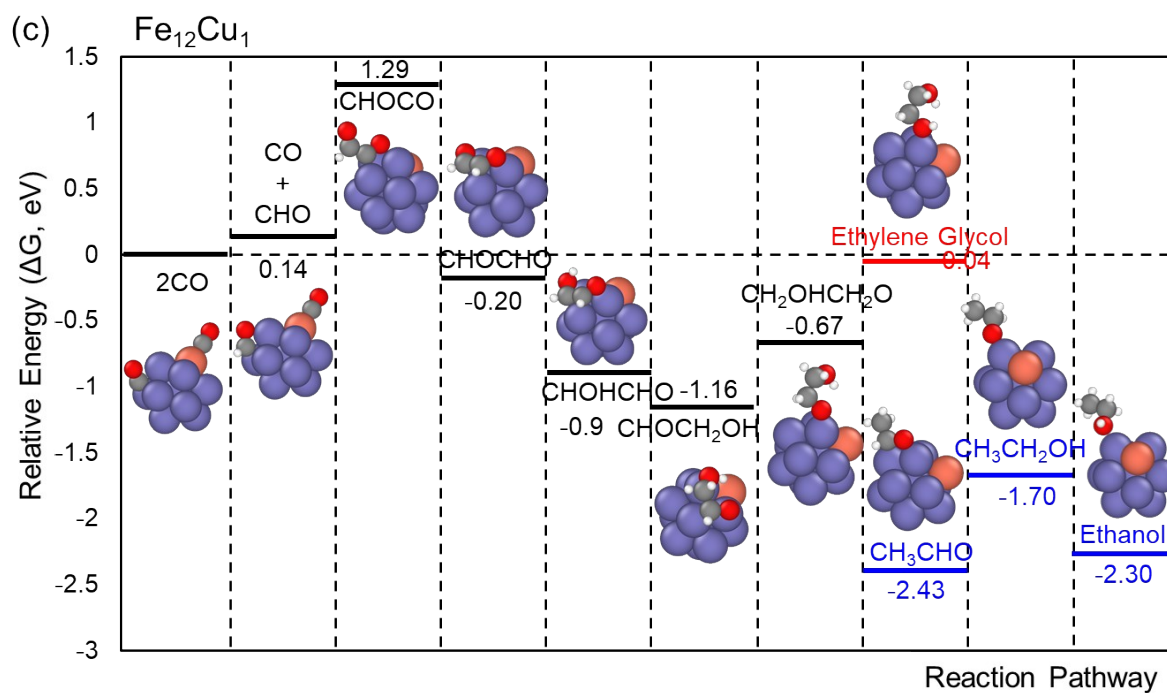

Figure S3. The profiles of the potential energy surface ( $\Delta G$ , eV) of 2CO molecules reduction towards C2 products on (a)  $\text{Cu}_{13}$ , (b)  $\text{Fe}_2\text{Cu}_{11}$ , and (c)  $\text{Fe}_{12}\text{Cu}_1$  nanoclusters, illustrating the relative energies of various intermediates and products in the reaction pathway.

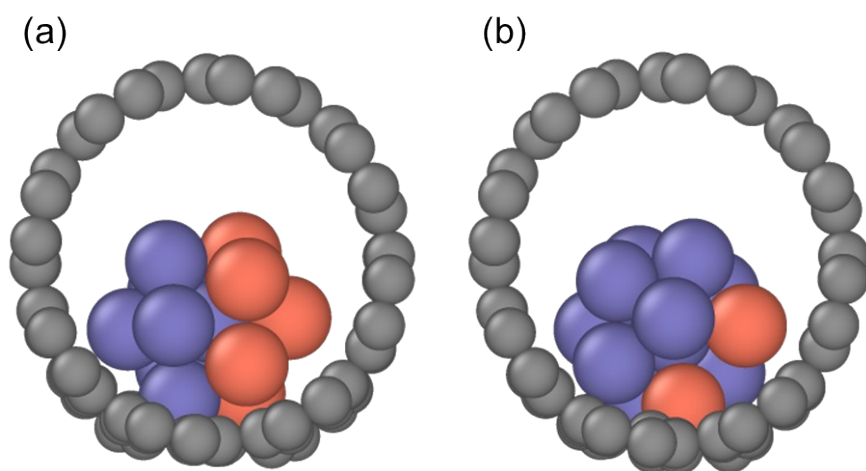

Figure S4. Optimized geometries of (a)  $\text{Fe}_7\text{Cu}_6/\text{CNT}$  and (b)  $\text{Fe}_{11}\text{Cu}_2/\text{CNT}$ .
